# Supplementary material for: Gold nanoparticles as an ultrathin scattering layer for efficient dye-sensitized solar cells
Source: Royal Society of Chemistry journal article supplement (doi:10.1039/c6tc00592f), 2016-01-01
Supplement: c6tc00592f1.pdf [file c6tc00592f1.pdf]

**Electronic Supplementary Information for**  
**Gold Nanoparticles as an Ultrathin Scattering Layer For Efficient**  
**Dye-Sensitized Solar Cells**

Lu Zhang and Zhong-Sheng Wang\*

Department of Chemistry, Lab of Advanced materials, iChEM (Collaborative Innovation Center of Chemistry for Energy Materials), Fudan University, 2205 Songhu Road, Shanghai 200438, P. R. China

E-mail: [zs.wang@fudan.edu.cn](mailto:zs.wang@fudan.edu.cn)

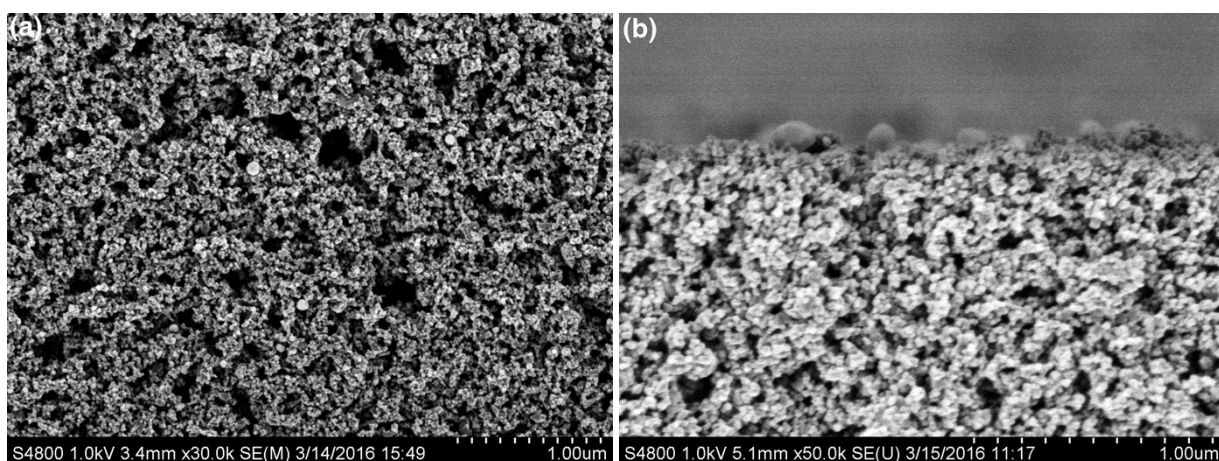

**Figure S1.** The top (a) and cross-sectional (b) view SEM images for the photoanode with Au layer of 48 nm nanoparticles

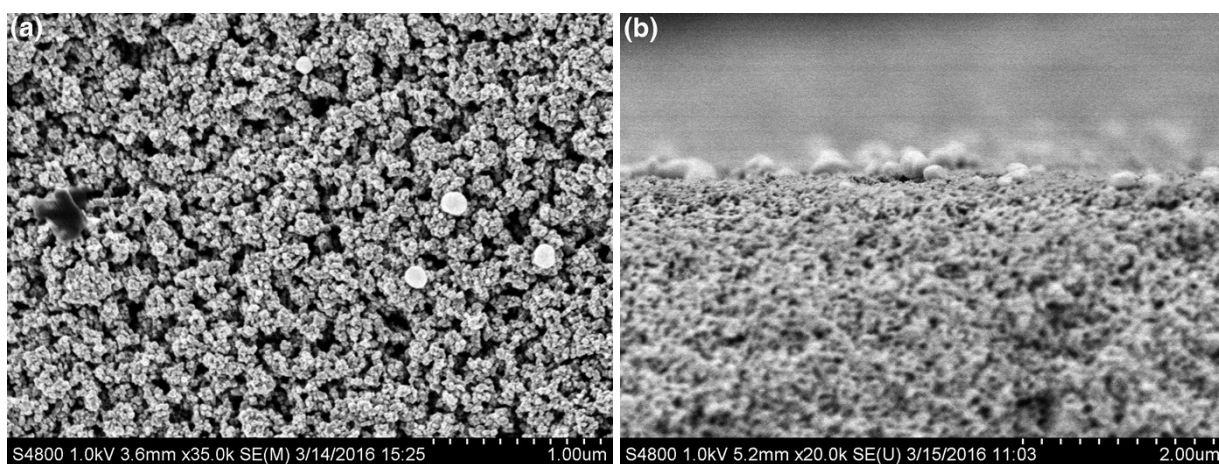

**Figure S2.** The top (a) and cross-sectional (b) view SEM images for the photoanode with Au layer of 94 nm nanoparticles

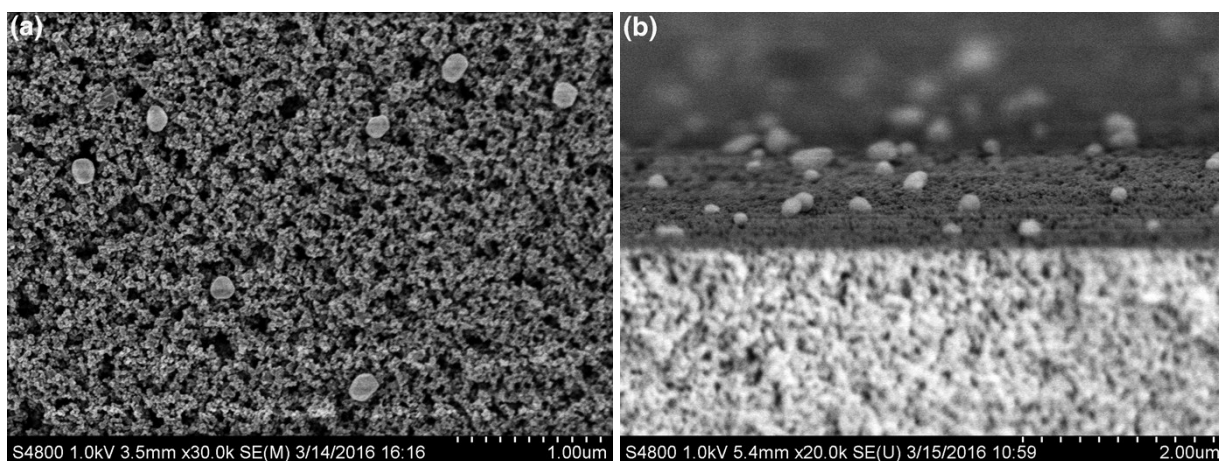

**Figure S3.** The top (a) and cross-sectional (b) view SEM images for the photoanode with Au layer of 125 nm nanoparticles

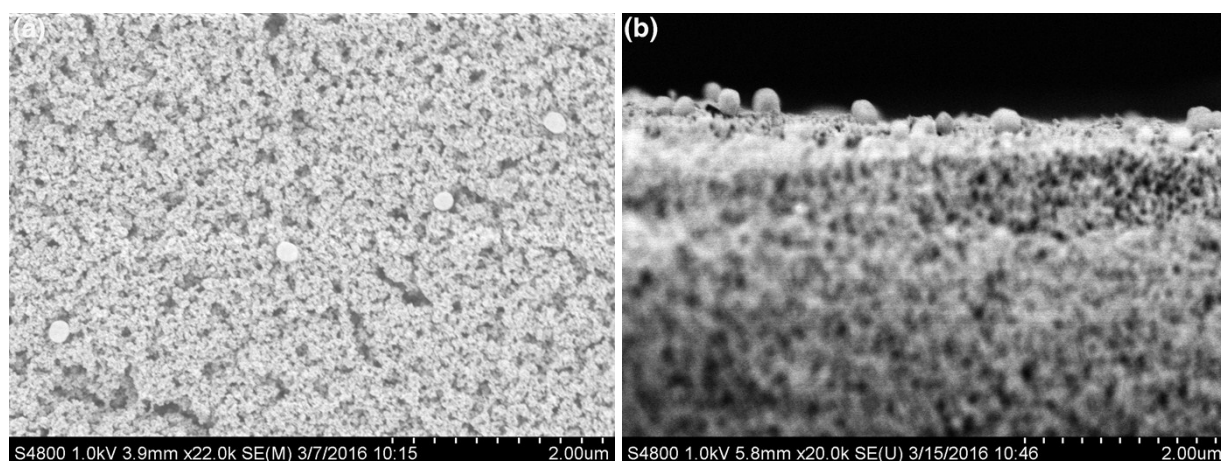

**Figure S4.** The top (a) and cross-sectional (b) view SEM images for the photoanode with Au layer of 162 nm nanoparticles

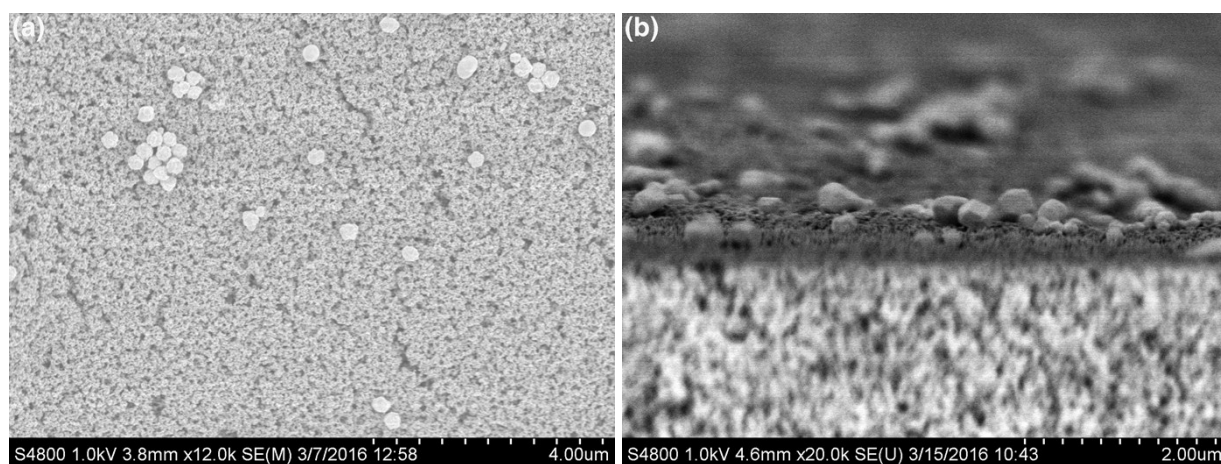

**Figure S5.** The top (a) and cross-sectional (b) view SEM images for the photoanode with Au layer of 203 nm nanoparticles

**Table S1.** Photovoltaic performance of DSSCs with different amount of Au nanoparticles (203 nm)

| Au amount/ $\mu\text{g cm}^{-2}$ | $V_{\text{oc}} / \text{mV}$ | $J_{\text{sc}} / \text{mA cm}^{-2}$ | FF   | $\eta / \%$ |
|----------------------------------|-----------------------------|-------------------------------------|------|-------------|
| 1                                | 764                         | 17.27                               | 0.73 | 9.63        |
| 2                                | 732                         | 14.81                               | 0.72 | 7.81        |
| 3                                | 711                         | 12.70                               | 0.74 | 6.68        |
| 4                                | 665                         | 8.04                                | 0.65 | 3.48        |
